RESEARCH ARTICLE

# Ontogeny of risk assessment and escape-hatching performance by red-eyed treefrog embryos in two threat contexts

Brandon A. Güell<sup>1</sup>, Julie Jung<sup>1</sup>, Adeline Almanzar<sup>1</sup>, Juliana Cuccaro-Díaz<sup>2</sup> and Karen M. Warkentin<sup>1,3,\*</sup>

## ABSTRACT

Arboreal embryos of red-eyed treefrogs, *Agalychnis callidryas*, hatch prematurely in response to hypoxia when flooded and to mechanosensory cues in snake attacks, but hatching later improves tadpole survival. We studied ontogenetic changes in risk assessment and hatching performance of embryos in response to flooding and physical disturbance. We hypothesized that risk assessment decreases as hatchling survival improves and hatching performance increases as embryos develop. Because snakes eat faster than embryos asphyxiate, we hypothesized that embryos decide to hatch sooner and hatch faster in response to mechanosensory cues. We video-recorded individual embryos hatching in response to each cue type, then compared the incidence and timing of a series of events and behaviors from cue onset to complete hatching across ages and stimuli. Latency from cue to hatching decreased developmentally in both contexts and was shorter with mechanosensory cues, but the elements contributing to those changes differed. Hypoxia assessment involved position changes, which decreased developmentally along with assessment time. Mechanosensory cue assessment occurred more rapidly, without movement, and decreased with age. The first stages of hatching, membrane rupture and head emergence, were surprisingly age independent but faster with mechanosensory cues, congruent with greater effort under more immediate risk. In contrast, body emergence and compression showed ontogenetic improvement consistent with morphological constraints but no cue effect. Both appropriate timing and effective performance of hatching are necessary for continued development. Different stages of the process vary with development and environmental context, suggesting combinations of adaptive context- and stage-dependent behavior, cue-related constraints on information acquisition, and ontogenetic constraints on elements of performance.

**KEY WORDS:** Behavioral latency, Embryo behavior, Environmentally cued hatching, Information sampling, Ontogenetic adaptation, Phenotypic plasticity

## INTRODUCTION

Adaptive animal behavior relies on effective use of information and performance of actions (Dall et al., 2005). As animals develop, their sensory (Gervais et al., 2021; Romagny et al., 2012) and motor

capabilities (Bate, 1999) change, affecting how they perceive cues and physically interact with their environment (Danchin et al., 2004; Wiedenmayer, 2009). Moreover, in order to respond with adaptive behaviors, animals must also balance the value of gathering information with its cost (e.g. sampling time, energy expenditure) (Bradbury and Vehrencamp, 1998; Dall et al., 2005; Warkentin and Caldwell, 2009). However, development changes the costs and benefits of performing specific behaviors in a given context, and therefore also alters which responses are best at different points in ontogeny (Wiedenmayer, 2009). Here, we tested how development affects the decision-making and performance processes of an essential animal behavior in response to two different threat cues, associated with different costs of sampling and latencies to mortality.

For oviparous animals, hatching is an essential and often behavioral process that developing embryos must perform. It typically requires the use of specific mechanisms to rupture the egg capsule and behaviors to exit from it (Bles, 1906; Cohen et al., 2018, 2016; Oppenheim, 1972; Yamagami, 1981, 1988). For many species, this can be a physically demanding process as developing embryos are often enclosed in multiple layers of membranes, jelly, shells, etc., that provide protection (Altig and McDiarmid, 2007; Dumont and Brummett, 1985). Hatching may be particularly challenging for younger, less developed embryos in species that have long plastic hatching periods (Warkentin, 2011). For instance, if hatching performance traits develop gradually, as a result of developing bodies and physical abilities, embryos may pass through an initial period of marginal hatching competence. In such cases, if partial hatching by less developed embryos compromises the protective functions of egg capsules, then hatching complications or failure may themselves cause embryo mortality, selecting against hatching attempts and increasing the premium on risk assessment and decision accuracy.

Adaptively plastic timing of hatching, cued by environmental conditions, is phylogenetically widespread (Warkentin, 2011). Environmentally cued hatching allows embryos to navigate fitness trade-offs to determine the optimal time to hatch in response to a variety of stimuli. Embryos often use prolonged or repeated sampling to inform their hatching decisions and balance the costs of missed cues and false alarms (Warkentin and Caldwell, 2009). However, as sampling increases, so does its cost. Assessment costs can be crucial for embryos sampling cues associated with a source of mortality (e.g. egg-predator cues), as increasing the lag time before hatching in these contexts increases the likelihood of death (Warkentin and Caldwell, 2009). Embryos should therefore adjust sampling of cues from different sources based on how the value and cost of information accrue. Development can also affect how embryos assess risk cues if the costs of sampling their environment, the hatching process or entry into their next life stage changes ontogenetically. Here, we used two different cues – hypoxia and physical disturbance – that indicate common threats to terrestrial

<sup>1</sup>Department of Biology, Boston University, 5 Cummington Mall, Boston, MA 02215, USA. <sup>2</sup>Departamento de Ciencias Biológicas, Universidad de los Andes, Cra 1 No. 18A-70, 111711, Bogotá, Colombia. <sup>3</sup>Gamboa Laboratory, Smithsonian Tropical Research Institute, Apartado Postal 0843-03092, Panamá, República de Panamá.

\*Author for correspondence (kwarken@bu.edu)

© B.A.G., 0000-0003-0191-718X; J.J., 0000-0001-8319-3984; A.A., 0000-0001-5024-4431; J.C.-D., 0000-0002-1653-9655; K.M.W., 0000-0002-7804-800X

eggs (flooding and predation) to assess how development changes the risk assessment, decision-making and hatching process in a well-studied example of environmentally cued hatching.

The terrestrial eggs of red-eyed treefrogs, *Agalychnis callidryas*, offer an excellent system for direct observations of embryo development and behavior in several induced-hatching contexts. Undisturbed embryos typically hatch at 6–7 days but use multiple sensory modalities to assess the risk of flooding and predation, hatching in response to hypoxia and mechanosensory cues (Jung et al., 2019, 2020; Warkentin, 2002, 2005). Hypoxia-cued hatching begins at 3 days and mechanosensory-cued hatching begins at 4 days (Warkentin et al., 2017). However, neither hypoxia nor physical disturbance consistently indicates a real threat to eggs. In particular, because of spatial gradients of oxygen within eggs (high at the air-exposed surface, low away from it; Warkentin et al., 2005), embryos often experience transient hypoxia as a result of their orientation within the egg, which they solve by changing position (Rogge and Warkentin, 2008). Embryos may also experience more persistent hypoxia if pond levels rise to submerge clutches, or if individual eggs or entire clutches fall into the water. Similarly, rainstorms produce intense vibrations with properties that overlap those in predator attacks, yet they pose no threat to eggs (Warkentin, 2005). This overlap in cue properties from benign and threatening sources of stimuli creates a discrimination challenge for embryos and necessitates adequate sampling to avoid false alarms and make informed decisions of whether and when to hatch. However, the cost of false alarms decreases developmentally; older hatchlings are larger, more developed, more behaviorally competent, and suffer lower mortality in the water, particularly with aquatic predators (Gibbons and George, 2013; Touchon et al., 2013; Warkentin, 1995, 1999a; Willink et al., 2014). In contrast, the ultimate cost of missed cues – death by asphyxiation or consumption by a predator – does not change across development (Warkentin and Caldwell, 2009).

Cued hatching in *A. callidryas* is mediated by rapid, localized enzyme release by two types of hatching gland cells (HGC) (Cohen et al., 2019). Early HGC appear at 3 days, begin to regress at 4 days, and enable the earliest cued hatching, while late HGC appear at 4 days, gradually increase in abundance, and mediate most hatching (Cohen et al., 2019). Before membrane rupture and hatching, most embryos exhibit shaking behavior associated with hatching enzyme release, indicating the onset of the hatching process (Cohen et al., 2016). Typically, embryos maintain their snout at the rupture site and use thrashing movements to propel themselves through the hole (Cohen et al., 2016). Developmental stage at hatching could affect the process or performance of hatching if using late HGC or more HGC accelerates the process of membrane rupture or increases the size of the hole produced, thereby facilitating exit from the capsule. Moreover, as embryos develop, they also increase in total size, their axial musculature increases, and they become more streamlined as their heads grow and the bulbous yolk sac transforms into gut coils (Warkentin, 1999b). These gross morphological changes may also facilitate their exit through a small membrane rupture and improve hatching performance. Thus, we hypothesized that hatching performance improves developmentally in response to both hypoxia and physical disturbance cues, resulting in older embryos hatching faster either overall or through specific periods within the process. Moreover, because the risk of mortality is more immediate and accrues more quickly in predator attacks than during flooding (i.e. rapid consumption versus gradual asphyxiation) (Warkentin and Caldwell, 2009; Warkentin et al., 2007), embryos cued by physical disturbance may exhibit hatching performance

closer to their maximum capacity. If so, we predict that the process of hatching – from initiation to exit from the egg – is faster in response to physical disturbance cues and that performance varies more in hypoxia-cued hatching than in mechanosensory-cued hatching.

*Agalychnis callidryas* embryos have distinct and measurable periods of cue sampling before deciding to hatch. For instance, when deprived of oxygen, either briefly when misoriented within their egg or for prolonged periods when flooded, embryos' first response is to reorient themselves within their eggs, changing position repeatedly in an attempt to return their gills to air-exposed parts of the egg (Rogge and Warkentin, 2008; Warkentin et al., 2017) (Movie 1). These position changes are distinct from the movements associated with hatching and are therefore useful indicators of oxygen sampling. However, sampling oxygen must come at some metabolic and sampling time cost, as embryos actively move their bodies to reposition their gills, stirring the perivitelline fluid, and after each position change it takes time for local oxygen levels to stabilize (Warkentin et al., 2005). Moreover, embryos pay an increasing developmental cost the longer they remain in the egg under hypoxic conditions (Snyder et al., 2018; Vasquez et al., 2016). In contrast, sampling vibrations and tactile cues in physical disturbance, using vestibular and lateral line mechanoreceptors (Jung et al., 2019; Jung et al., 2020), requires no movement and thus less energy, and information accrues more rapidly (Caldwell et al., 2009; Warkentin and Caldwell, 2009), although embryos risk the greater and more immediate threat of being eaten while sampling this type of information (Warkentin and Caldwell, 2009). As hatchling mortality decreases with development, younger embryos should spend more time sampling both cue types before deciding to hatch, and younger embryos should also sample more positions when flooded. Sampling periods of age-matched embryos should be shorter in response to physical disturbance cues because mortality accrues faster in predator attacks.

Previous work has used latency from stimulus onset to hatching completion to estimate cue sampling (Jung et al., 2019, 2020; Warkentin et al., 2017, 2019) and found that latency to hatch in response to vibration playback decreases from age 5 to 6 days (Warkentin et al., 2019). However, this latency period includes the time required to rupture and exit the egg in addition to the risk-assessment and decision-making processes. Thus, latency from stimulus onset to hatching initiation may be a more accurate measure of cue sampling. Moreover, to understand whether changes in hatching behavior occur evenly across development or whether specific changes are concentrated in shorter periods, associated with specific developmental changes, it is necessary to measure ontogenetic changes in both hatching performance and risk assessment across the full period of hatching competence. Thus, we video-recorded individual *A. callidryas* embryos at 3–6 days hatching in response to hypoxia (flooding) and physical disturbance (jiggling) cues and compared the occurrence and timing of specific behaviors and periods within the risk-assessment and hatching processes across ages.

## MATERIALS AND METHODS

### Egg clutch collection and care

We collected young (0–3 days old) *Agalychnis callidryas* (Cope 1862) egg clutches on leaves from the Experimental Pond in Gamboa, Panama (9°7'15''N, 79°42'14''W), attached the leaves to plastic support cards and placed them in cups over aged, dechlorinated tap water to catch hatchlings. Clutches were maintained in an open-air, ambient temperature and humidity

laboratory at the Smithsonian Tropical Research Institute (STRI) in large plastic bins, with screen windows in the lids to allow air flow, and were misted frequently with rainwater to maintain hydration. All embryos used were morphologically normal, in developmental synchrony with siblings in their clutch, and in intact, turgid eggs at the start of testing. Most eggs are laid between 22:00 h and 02:00 h, so we assigned embryo ages starting from midnight of their oviposition night (Warkentin, 2002; Warkentin et al., 2005). We returned all hatched tadpoles to the Experimental Pond after experiments. All research was conducted under STRI IACUC protocol 2014-0601-2017 and Boston University IACUC protocol 14-008 and permits from the Panamanian Ministry of the Environment (SC/A-15-14, SE/A-46-15, SE/A-59-16).

### Hypoxia-cued hatching

To assess developmental changes in hypoxia-cued hatching, we placed individual eggs in custom-made glass egg cups (Fiamma Glass, Waltham, MA, USA; Fig. 1), flooded them, and video-recorded embryos hatching at four ages, from 3 to 6 days. Because the requirements and tolerance of embryos change as they develop, recording hypoxia-cued hatching across the largest possible age range required varying two method elements: the period that eggs were in cups before testing, and how long before testing these eggs (in cups) were moved to the testing tank. We moved all eggs to cups

at a uniform age, 3 days, chosen to minimize the effect of transfer on development. Young *A. callidryas* eggs absorb water from their clutch jelly, increasing perivitelline volume up to 12-fold, and well-hydrated eggs then remain stable in size from 3 days (Cohen et al., 2019; Salica et al., 2017). Optimizing the timing of transfer to cups limited how long before testing the youngest embryos could be moved to the test tank. At 4 days, vestibular system function and mechanosensory-cued hatching begin (Jung et al., 2019, 2020; Warkentin et al., 2017). Motion sensitivity increases with further ear development (Jung et al., 2017, 2018) and tolerance for false alarms increases as hatchling survival increases (Jung et al., 2021; Warkentin et al., 2019). Moving eggs (in cups) to test tanks at 6 days induced hatching; thus, assessing embryos' response to hypoxia required moving them earlier, before it induced hatching, and leaving them longer in test tanks.

The cups were designed to fit fully expanded eggs closely (interior diameter ca. 5 mm, depth 3–4 mm) and were mounted on glass bases with their opening vertically oriented (Fig. 1A). Eggs in cups were thus exposed to air on one side (henceforth the 'front'), but the glass – rather than sibling eggs or leaf – blocked gas exchange through about half of their surface, providing a standardized, yet naturalistic, oxygen environment (Rogge and Warkentin, 2008; Warkentin, 2002; Warkentin et al., 2005) (Movie 1). The egg cups allowed us to move the eggs without touching them, facilitating manipulation of mechanoresponsive embryos, and improved the visibility of behaviors. Based on embryos' external morphology, rearing in cups from 3 days did not alter development; however egg transfer at less than 2 days caused some developmental changes and mortality in pilot experiments. We placed eggs (in cups) in a plastic container with a screened window in the lid and misted the eggs and interior of the container frequently with rainwater to maintain hydration.

We tested embryos at 3–5 days during June and July 2014, and at 5–6 days during June and July 2015. We began testing embryos at 3 days at 18:00 h, when all sibships were hatching competent (Warkentin et al., 2017), and we tested embryos from 4 to 6 days between 08:00 h and 16:00 h. In 2014, we tested embryos in a small aquarium constructed from a Plexiglas tube (5 cm diameter, 6.8 cm high) with a glass front inserted, creating an optically clear area (3.5 cm wide × 4 cm high) for viewing and recording. To begin a test, we moved an egg (in cup) into the tank (Fig. 1), waited 5 min to ensure that the setup process had not stimulated hatching (Jung et al., 2022), then began recording. We recorded videos at 30 frames s<sup>-1</sup> using a Canon EOS 5D Mark III camera and MP-E 65 mm macro lens, with the egg illuminated from both sides using two LED lights. We gently flooded the aquarium with hypoxic water to submerge the egg (Movie 1). To make hypoxic water, we boiled tap water for at least 10 min, sealed it in glass-stoppered BOD bottles without air bubbles, and allowed it to cool. Water was used within 30 min of opening the bottle (15 ± 1.3% air saturated at opening, 21 ± 3% air saturated at 30 min, N = 10 bottles, mean ± s.d. here and in text throughout). In other work, we have found strong behavioral responses, including hatching, of fully exposed *A. callidryas* embryos as young as 3 days in response to much higher oxygen levels (60–80% air saturated; Snyder et al., 2018). We recorded video until the embryo hatched, then moved hatchlings to air-saturated water. We photographed all hatchlings in dorsal view next to a ruler, then measured hatchling size from photographs using ImageJ (Schneider et al., 2012). The few embryos at age 3 days that failed to hatch were removed from the test chamber after 40 min and either returned to air, in their egg cups, or manually decapsulated and placed into air-saturated water.

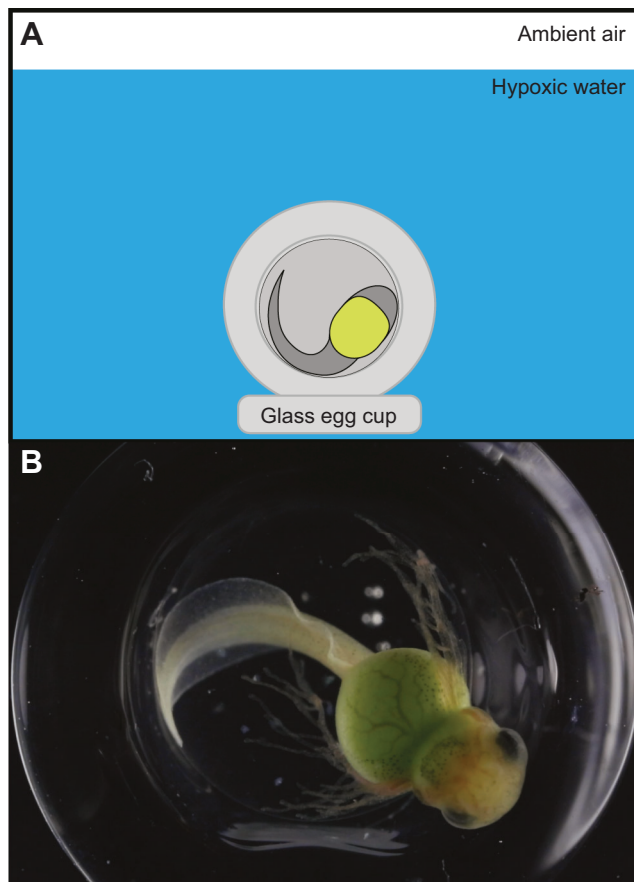

**Fig. 1. Methods for video-recording hypoxia-cued hatching of individual *Agalychnis callidryas* embryos.** (A) Focal embryo in a glass egg cup submerged in hypoxic water in a glass-fronted Plexiglas tank. Illustration is not to scale. (B) Cropped camera view of an *A. callidryas* embryo at 3 days of age in the process of hatching. Body compression is evident (see also Movie 3).



In 2014, our attempts to move eggs (in cups) into the video-recording tank at 6 days elicited mechanosensory-cued hatching, precluding assessment of hypoxia-cued hatching. Therefore, in 2015, we set up eggs (in cups) in sets of four in larger video-recording tanks (width, depth, height: 10.3×4.9×8 cm) at age 3 or 4 days and left them undisturbed until testing. We misted the eggs (in cups) and interior of tanks with rainwater frequently and covered the tanks with dampened mesh to maintain eggs hydrated until testing, as with eggs tested in 2014. At testing, we focused the camera on a single intact egg, flooded the tank as above, and recorded the behavior and hatching of the embryo. We used these methods for five additional embryos tested at 5 days and all embryos tested at 6 days. As the two methods did not measurably alter the hatching behavior or performance of embryos at age 5 days, we pooled the data for analysis.

### Mechanosensory-cued hatching

To assess developmental changes in mechanosensory-cued hatching, we manually jiggled eggs, following methods from Warkentin et al. (2017), and video-recorded hatching at three ages: 4, 5 and 6 days. Jiggling does not induce hatching of embryos at 3 days because of insufficient development of mechanosensory systems (Jung et al., 2019, 2020). For each test, we removed an individual egg from its clutch, placed it in a small hexagonal weigh boat with a drop of water, and waited at least 5 min after transferring the egg to the testing dish to ensure that the transfer process did not induce hatching. Then, we manually jiggled the egg using a moistened blunt metal probe, alternating 15 s of stimulation with 15 s of rest for 5 min or until the embryo hatched (see movie 1 in Warkentin et al., 2017). We conducted mechanosensory-cued hatching tests during June–August 2016 between 12:00 h and 18:00 h. All hatchlings were photographed and measured as above.

In many cases, moving embryos from their clutch to the weigh boat for testing at age 6 days induced hatching, without any further jiggling, limiting the number of individuals that met our criterion for acclimation time and stimulation protocol. Relaxing this criterion to increase the sample size at age 6 days, including egg transfer as a physical disturbance stimulus, did not alter our results; thus, we present data from only the set of trials that met all criteria.

### Video analysis

We recorded a total of 148 individual embryos hatching in response to hypoxia cues, including up to two individuals per age per clutch and up to three ages per clutch. Of these, we analyzed 45 recordings from 32 clutches ( $N=10, 10, 15$  and  $10$  individuals from 10, 10, 12 and 10 clutches at 3–6 days, respectively) that met the following criteria: (i) the embryo had an undisturbed 5 min acclimation period; (ii) the flooding process did not tip or shift the glass cup from its original position; (iii) the initial membrane rupture was made in the front, exposed portion of the egg, not against the glass; (iv) the embryo exited through the initial membrane rupture; and (v) the embryo completely exited from its egg capsule without obstruction by the glass cup. We recorded a total of 100 individual embryos hatching in response to physical disturbance cues (up to two individuals per age per clutch and up to two ages per clutch) and analyzed a total of 36 recordings from 33 clutches ( $N=13, 16$  and  $7$  individuals from 11, 16 and 6 clutches at 4–6 days, respectively) that met the following criteria: (i) the embryo had an undisturbed 5 min acclimation period; (ii) physical disturbance did not continue after the embryo began performing hatching behavior; (iii) the embryo exited through the initial membrane rupture; and (iv)

the timing of events was visible in and accurately measurable from the video recording.

From the videos, we quantified the occurrence and timing of a series of events and behaviors within the hatching process, some of which are described elsewhere (Cohen et al., 2016), and compared them across ages and stimuli. We defined cue-sampling duration as the period from stimulus onset (complete submergence in hypoxic water or start of egg jiggling in physical disturbance) to when behaviors indicating the onset of hatching began. We also counted the number of times embryos changed position within the egg throughout this cue-sampling period. As indicators of the initiation of hatching, we used four behaviors that are often expressed shortly before membrane rupture: shaking, mouth gaping, jerks and buccal cavity compressions. Shaking refers to axial muscle contractions that generate low-amplitude lateral movements (Cohen et al., 2016). Mouth gaping resembles buccal pumping but with larger amplitude movements and extended duration of the gape (Cohen et al., 2016). Jerks consist of single axial muscle contractions that are stronger than an individual contraction within shaking behavior (Movie 2). Buccal cavity compressions cause a brief change in the shape of the snout, without gaping open the mouth or jerking the body (Movie 2). As hatching enzyme release has been experimentally shown to occur during shaking (Cohen et al., 2016), we used the onset of shaking to estimate hatching initiation if embryos exhibited this behavior. If shaking did not occur, we used one of the alternative behavioral indicators that embryos performed prior to membrane rupture, with their snout positioned at the location of the subsequent rupture, to estimate the beginning of hatching ( $N=1, 1, 2$  and  $4$  embryos at 3–6 days, in hypoxia trials only). We were unable to clearly assess the timing of any behavioral indicator in two jiggling trials. We assessed the timing of key events within the hatching process with 1/30 s (single frame) accuracy and used these to calculate the following periods: hatching initiation to membrane rupture, membrane rupture to head emergence, head emergence to body emergence (excluding the tail), hatching initiation to complete exit from the egg, and start of thrashing to complete exit from the egg. Thrashing motions are performed by most embryos before and during their exit from the capsule and consist of high-amplitude body undulations that travel from snout to tail (Cohen et al., 2016). In two hypoxia trials, embryos successfully hatched but rested for an extended period with their tail tip within the capsule; we considered these to have exited the egg when their body emerged from the membrane. As we recorded video at 30 frames  $s^{-1}$ , we could not accurately measure shorter durations; for analysis, we assigned durations of 1/30 s to all processes completed in  $\leq 1/30$  s ( $N=6$ ).

### Statistics

We used linear and generalized linear mixed models (LMM and GLMM; ‘lme4’ package; Bates et al., 2015) with clutch as a random effect, followed by likelihood ratio tests of nested models to determine the main effects of age (coded as ordinal), cue type and their interaction. When age×cue type interaction effects were significant in our original models, we ran additional, independent mixed models on data within each cue type, followed by likelihood ratio tests for age effects. When overall age effects were significant within cue types, we used Tukey *post hoc* tests (‘multcomp’ package; Hothorn et al., 2008) to determine differences between specific ages. To test for effects of cue type on variation in hatching latency and elements of hatching performance, within ages, we used Fligner–Killeen tests of homogeneity of variances. We used LMMs on natural-log-transformed data when original data did not fit gaussian, gamma or binomial error distributions. We performed

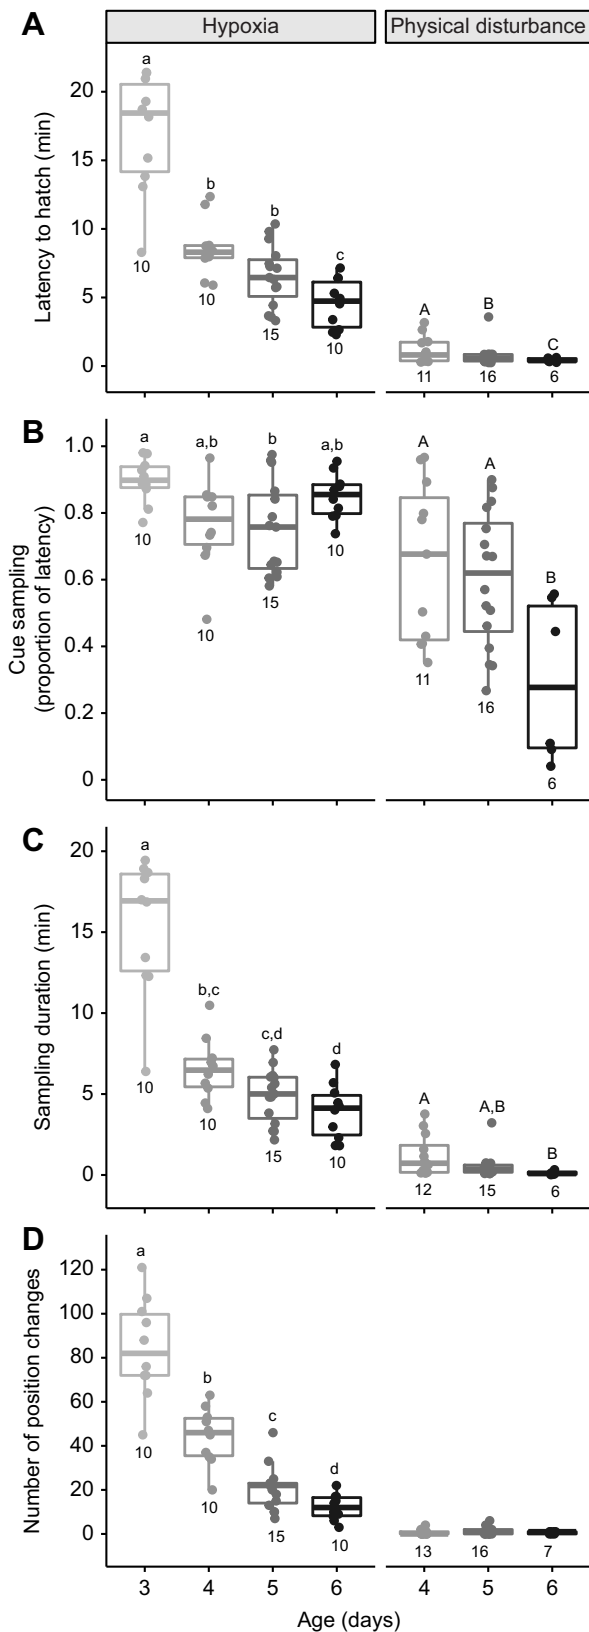

**Fig. 2. Ontogeny of latency to hatch and cue sampling by *A. callidryas* embryos in response to hypoxia and mechanosensory cues.** (A) The entire latency period, from the onset of stimulation to complete exit from the egg, and (B) the cue-sampling or risk-assessment period, from stimulus onset to hatching initiation, as a proportion of latency. (C) The duration of and (D) number of position changes during the sampling period. Different letters indicate significant differences between ages from Tukey *post hoc* analysis of mixed models on data from each cue type. The number of individuals (*N*) measured per age, per cue type is shown. Data points are values from individual embryos. Box plots show medians, interquartile range (IQR) and extent of data to  $\pm 1.5 \times \text{IQR}$ .

test whether time to thrashing onset predicts time to head emergence, measuring both from membrane rupture. All statistical tests were performed in the R statistical environment using RStudio (version 1.0.143; <https://www.rstudio.com/products/rstudio/>).

## RESULTS

### Hatchling size

As expected, age was the strongest predictor of hatchling size (LMM, main effect of age:  $\chi^2=86.463$ ,  $P<2.2\text{e-}16$ ) regardless of whether we included 3-day-old hatchlings from hypoxia tests (Fig. S1). Hatchling size increased developmentally in both hypoxia ( $\chi^2=59.972$ ,  $P=5.96\text{e-}13$ ) and physical disturbance tests ( $\chi^2=7.878$ ,  $P=0.019$ ; Fig. S1).

### Latency to hatch

The latency to hatch (i.e. to fully exit the egg) after stimulus onset varied with cue type, age and an age $\times$ cue type interaction (cue type:  $\chi^2=81.151$ ,  $P<2.2\text{e-}16$ ; age:  $\chi^2=41.131$ ,  $P=8.828\text{e-}08$ ; interaction:  $\chi^2=52.086$ ,  $P=4.894\text{e-}12$ ). Across ages, latency was longer for flooded eggs (hypoxia; range: 2.29–21.41 min) than for jiggled ones (physical disturbance; range: 0.25–3.58 min; Fig. 2A). Examining the effect of age within each cue type, latency to hatch in response to hypoxia decreased by 73% from age 3 to 6 days ( $\chi^2=49.066$ ,  $P=1.26\text{e-}10$ ) and differed across all ages except 4 versus 5 days (Tukey tests from GLMM, 4 versus 5 days:  $P=0.173$ ; 5 versus 6 days:  $P=0.019$ ; all others:  $P<0.001$ ). Across ages 4–6 days, latency to hatch in response to hypoxia decreased 53%, comparable to the 50% decrease in latency in response to physical disturbance ( $\chi^2=49.832$ ,  $P=1.51\text{e-}11$ ). Under physical disturbance, latency was different at each age (Tukey tests from GLMM, all pairwise comparisons  $P<2\text{e-}16$ ; Fig. 2A). The variance in latency to hatch was higher for flooded embryos than for jiggled ones at ages 5 and 6 days, but not at age 4 days (Fligner–Killeen tests, 4 days:  $\chi^2=0.828$ ,  $P=0.363$ ; 5 days:  $\chi^2=10.03$ ,  $P=0.0015$ ; 6 days:  $\chi^2=7.692$ ,  $P=0.006$ ; all d.f.=1; Fig. 2A).

### Information sampling and decision making

The proportion of latency to hatch spent in information sampling and decision making (i.e. the period from stimulus onset to hatching initiation) varied with age, cue type and their interaction (gamma GLMM, age:  $\chi^2=18.407$ ,  $P=0.002$ ; cue type:  $\chi^2=28.815$ ,  $P=2.45\text{e-}06$ ; interaction:  $\chi^2=16.322$ ,  $P=0.0003$ ). On average across ages, the sampling period accounted for a greater portion of the latency to hatch for flooded than for jiggled embryos (80.9% and 56.4%, respectively; Fig. 2B). Among flooded eggs, the main effect of age ( $\chi^2=10.502$ ,  $P=0.015$ ) was due to a difference between ages 3 and 5 days (Tukey test from GLMM,  $P=0.02$ ; all other pairwise comparisons  $P>0.08$ ; Fig. 2B). In jiggled eggs, the portion of latency spent sampling was smaller at 6 days compared with both 4 and 5 days (main effect of age:  $\chi^2=8.285$ ,  $P=0.016$ , Tukey test

*t*-tests and Wilcoxon signed-rank tests to determine whether sampling durations and number of position changes were statistically different from zero at 6 days. We used a GLMM to

from GLMM, 6 versus 4 days:  $P=0.028$ ; 6 versus 5 days:  $P=0.041$ ; Fig. 2B).

Embryo age, cue type and their interaction all had strong effects on the absolute sampling duration (gamma GLMM, age:  $\chi^2=43.262$ ,  $P=3.27\text{e}-08$ ; cue type:  $\chi^2=88.252$ ,  $P<2.2\text{e}-16$ ; interaction:  $\chi^2=25.26$ ,  $P=3.273\text{e}-06$ ; Fig. 2C) as well as on the number of position changes during cue sampling (Poisson GLMM, age:  $\chi^2=360.46$ ,  $P<2.2\text{e}-16$ ; cue type:  $\chi^2=134.94$ ,  $P<2.2\text{e}-16$ ; interaction:  $\chi^2=14.894$ ,  $P=0.0006$ ; Fig. 2D). Analyses within each cue type showed that sampling duration decreased with age in both flooded ( $\chi^2=49.716$ ,  $P=9.18\text{e}-11$ ) and jigged eggs ( $\chi^2=13.151$ ,  $P=0.001$ ).

The number of positions sampled also decreased with age in flooded eggs ( $\chi^2=363.07$ ,  $P<2.2\text{e}-16$ ; Fig. 2D) but not jigged ones ( $P>0.1$ ). Overall, jigged embryos sampled for less time and assumed fewer positions compared with flooded ones (Fig. 2C,D). Even at 6 days, flooded embryos changed position on average 12 times (range: 3–22) while, across ages, 18 out of 36 jigged embryos hatched without changing position and 9 more moved only once (range: 0–6 position changes). The mean duration of the sampling period at 6 days was statistically greater than zero with both cue types ( $t$ -tests; hypoxia:  $3.92\pm 1.69$  min,  $t=7.3386$ ,  $P=4.38\text{e}-05$ ; physical disturbance:  $0.13\pm 0.12$  min,  $t=2.608$ ,  $P=0.048$ ). However, the mean number of position changes was only greater than zero in hypoxia tests (hypoxia:  $12.1\pm 5.86$ ,  $t=6.531$ ,  $P=0.0001$ ; physical disturbance:  $0.57\pm 0.53$ ,  $V=10$ ,  $P=0.072$ ). Among flooded embryos, movement rates (i.e. the number of position changes per minute) decreased with age ( $\chi^2=29.596$ ,  $P=1.68\text{e}-06$ ) from  $5.71\pm 1.5$  position changes per minute at 3 days (range: 3.8–8.2 per minute) to  $3.12\pm 1.11$  position changes per minute at 6 days (range: 1.0–4.9 per minute). Movement rates were specifically lower for flooded embryos at 5 and 6 days compared with 3–4 days (all  $P\leq 0.005$ ).

### Hatching process

The entire hatching process, from hatching initiation to complete exit from the egg, took on average  $55.8\pm 66.2$  s, across all ages and cue types (range: 0.09–6.11 min). We found significant effects of age, cue type, and their interaction on the duration of hatching, regardless of whether we excluded flooded eggs at 3 days (gamma GLMM, age:  $\chi^2=18.45$ ,  $P=0.001$ ; cue type:  $\chi^2=37.611$ ,  $P=3.417\text{e}-08$ ; interaction:  $\chi^2=12.419$ ,  $P=0.002$ ). Across ages, the mean duration of the hatching process was shorter in jigged than in flooded eggs ( $0.23\pm 0.12$  versus  $1.53\pm 1.23$  min; Fig. 3A). Among flooded embryos, those at 6 days hatched the fastest, taking half as long, on average, compared with all other age groups (Tukey test from GLMM, all  $P<0.05$ ; Fig. 3A). Conversely, in jigged eggs, hatching took longer at 6 days than at 4 and 5 days (both  $P<0.0005$ ; Fig. 3A). Thus, the overall fastest hatching ( $12.75\pm 5.36$  s) was for 4 and 5 day embryos in jigging trials. The duration of hatching was more variable in response to flooding than to jigging at 4 and 5 days, but not at 6 days (Fligner–Killeen tests, 4 days:  $\chi^2=10.996$ ,  $P=0.00913$ ; 5 days:  $\chi^2=13.182$ ,  $P=0.00028$ ; 6 days:  $\chi^2=2.5768$ ,  $P=0.1084$ ; all d.f.=1; Fig. 3A).

Examining the period from hatching initiation to membrane rupture, we found a significant effect of age (gamma GLMM,  $\chi^2=12.358$ ,  $P=0.03$ ) and no age×cue type interaction ( $\chi^2=3.093$ ,  $P=0.213$ ). In contrast, cue type strongly affected the initiation to rupture period ( $\chi^2=67.408$ ,  $P=1.532\text{e}-14$ ), which was shorter in response to jigging (Fig. 3B). Because only shaking has been experimentally validated as a behavioral indicator of hatching enzyme release, we repeated this analysis on a dataset restricted to embryos that exhibited shaking; removing the eight cases with other

hatching indicators slightly weakened the age effect ( $\chi^2=11.488$ ,  $P=0.0425$ ). Variance in the initiation to rupture period was larger in response to flooding than to jigging at 4 and 5 days, but not at 6 days (Fligner–Killeen tests, 4 days:  $\chi^2=14.503$ ,  $P=0.0001$ ; 5 days:  $\chi^2=15.98$ ,  $P=6.4\text{e}-05$ ; 6 days:  $\chi^2=2.827$ ,  $P=0.0927$ ; all d.f.=1; Fig. 3B).

The duration of the period from membrane rupture to head emergence only varied with cue type (gamma GLMM, age:  $\chi^2=10.019$ ,  $P=0.075$ ; cue type:  $\chi^2=20.759$ ,  $P=0.0001$ ; interaction:  $\chi^2=4.1308$ ,  $P=0.127$ ; Fig. 3C). This period was shorter for jigged embryos than for flooded ones ( $4.7\pm 3.8$  versus  $18.8\pm 18.8$  s, Fig. 3C). The period from membrane rupture to head emergence was more variable in response to flooding than to jigging at 4 and 5 days, but not at 6 days (Fligner–Killeen tests, 4 days:  $\chi^2=6.427$ ,  $P=0.011$ ; 5 days:  $\chi^2=13.4$ ,  $P=0.0003$ ; 6 days:  $\chi^2=2.433$ ,  $P=0.119$ ; all d.f.=1; Fig. 3C).

We found no significant effect of cue type or age×cue type interaction on the period from head to body emergence (log-normal LMM, both  $P>0.5$ ). Conversely, age was a strong predictor of the head to body emergence period ( $\chi^2=38.97$ ,  $P=2.41\text{e}-07$ ). The trend of a monotonic developmental decrease was also evident in analyses of each cue type separately, but only significant with hypoxia (hypoxia:  $\chi^2=29.65$ ,  $P=1.64\text{e}-06$ ; physical disturbance:  $\chi^2=5.23$ ,  $P=0.07$ ; Fig. 3D). Variance in the period from head to body emergence was not different across cue types at any age (Fligner–Killeen tests, all ages  $P>0.1$ ; Fig. 3D).

The period from membrane rupture to the start of thrashing was affected by age and cue type, with a marginally non-significant interaction effect (LMM, age:  $\chi^2=16.351$ ,  $P=0.006$ ; cue type:  $\chi^2=21.201$ ,  $P=9.56\text{e}-05$ ; interaction:  $\chi^2=5.71$ ,  $P=0.058$ ; Fig. 3E). However, independent analyses within cue types found no effect of age for either flooded or jigged embryos (both  $P>0.05$ ). The rupture to thrashing period was shorter for jigged embryos than for flooded ones ( $4.4\pm 5.5$  versus  $24.1\pm 22.5$  s). At 4 days, a few embryos began thrashing prior to membrane rupture, resulting in negative values for this period (jigging:  $-10.9$  s; flooding:  $-0.58$  and  $-0.59$  s). The period from membrane rupture to the start of thrashing was more variable in response to flooding than to jigging at all ages (Fligner–Killeen tests, 4 days:  $\chi^2=6.02$ ,  $P=0.0142$ ; 5 days:  $\chi^2=13.05$ ,  $P=0.0003$ ; 6 days:  $\chi^2=5.48$ ,  $P=0.02$ ; all d.f.=1; Fig. 3E). The period from membrane rupture to head emergence depends strongly on the period from membrane rupture to thrashing onset (gamma GLMM,  $R^2=0.57$ ,  $\chi^2=154.41$ ,  $P<2.2\text{e}-16$ ).

Embryo age, cue type and their interaction all had significant effects on the period from the start of thrashing to complete exit from the egg (log-normal LMM, age:  $\chi^2=46.457$ ,  $P=7.33\text{e}-09$ ; cue type:  $\chi^2=20.6$ ,  $P=0.0001$ ; interaction:  $\chi^2=13.475$ ,  $P=0.0012$ ; Fig. 3F). In independent analyses within cue type, we found the duration of this period decreased strongly with age in flooded eggs ( $\chi^2=53.448$ ,  $P=1.471\text{e}-11$ ) but did not vary with age in jigged ones ( $P>0.5$ ; Fig. 3E). Variance in the time from start of thrashing to exit was higher for jigged embryos than for flooded ones at 4 and 6 days but was not different at 5 days (Fligner–Killeen test, 4 days:  $\chi^2=5.95$ ,  $P=0.0147$ ; 5 days:  $\chi^2=0.946$ ,  $P=0.331$ ; 6 days:  $\chi^2=8.91$ ,  $P=0.003$ ; all d.f.=1).

Embryo age had a strong and significant effect on the incidence of body compression (binomial GLMM,  $\chi^2=27.527$ ,  $P=4.503\text{e}-05$ ; Fig. 4A), but neither cue type nor age×cue type interaction was significant (both  $P>0.1$ ). At 3 days, all embryos experienced body compression during hatching (Movie 3) while at 6 days only one embryo from each cue type did; overall, the likelihood of body compression decreased an average of  $\sim 30\%$  and  $8.25\%$  per day in

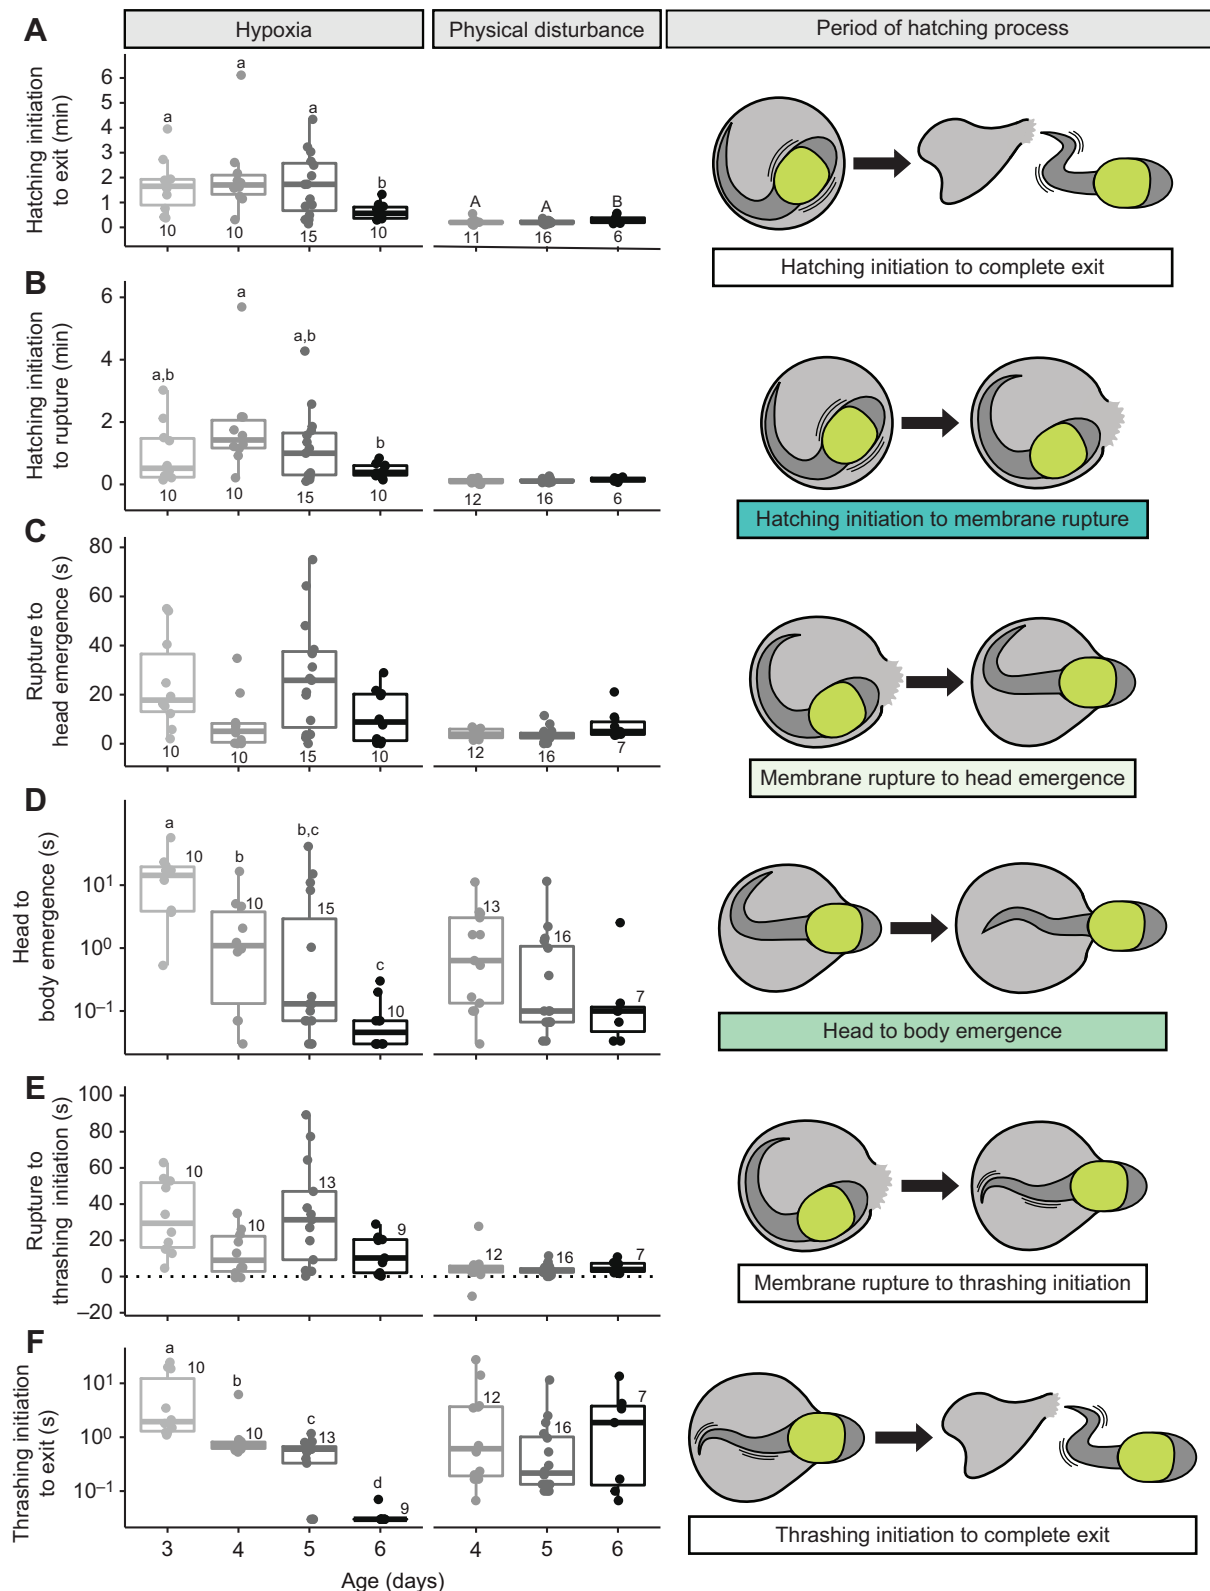

**Fig. 3. Ontogeny of hatching performance by *A. callidryas* embryos in response to hypoxia and mechanosensory cues.** Periods from (A) hatching initiation to complete exit from the egg, (B) hatching initiation to membrane rupture, (C) membrane rupture to head emergence (excluding the tail), (D) head to body emergence (excluding the tail), (E) membrane rupture to thrashing initiation, and (F) thrashing initiation to complete exit from the egg. Note the log scale of the y-axis in D and F, and that thrashing may begin before or after membrane rupture (E). Different letters indicate significant differences between ages from Tukey *post hoc* analysis of mixed models on data from each cue type. The number of individuals measured per age, per cue type is indicated; some embryos did not thrash and hatching initiation was not recorded for all jiggled eggs. Points indicate data from individual embryos. Box plots show medians, IQR and extent of data to  $\pm 1.5 \times \text{IQR}$ . Illustrations of periods within the hatching process (B–D) are color coded to match data presented in Fig. 5.



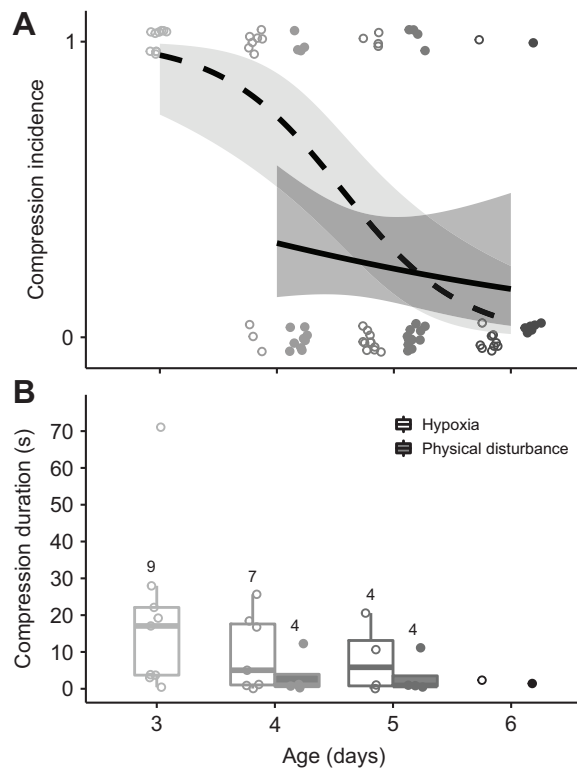

**Fig. 4. Ontogeny of body compression incidence and duration during hatching of *A. callidryas* embryos in response to hypoxia and mechanosensory cues.** (A) Incidence of body compression during exit from the egg. Values of 1 and 0 indicate visible compression and lack thereof during hatching, respectively. Open (hypoxia) and filled (physical disturbance) data points are jittered horizontally and vertically to show data points within each age group and cue type. Dashed (hypoxia) and solid (physical disturbance) lines are predicted fits from binomial generalized linear mixed models; shading indicates the 95% confidence interval. (B) Duration of body compression during hatching. Points are jittered horizontally to show data within each age group and cue type. Open (hypoxia) and filled (physical disturbance) data points represent values for individual embryos and the number of individuals measured per age, per cue type is indicated. Box plots show medians, IQR and extent of data to  $\pm 1.5 \times \text{IQR}$ .

hypoxia and physical disturbance tests, respectively (Fig. 4A). The duration of body compression, for those embryos that experienced it, also appeared to decrease with age, but we found no significant age, cue type or interaction effects on compression duration (gamma GLMM, all  $P > 0.1$ ; Fig. 4B).

## DISCUSSION

In two common threat contexts, using cues in different sensory modalities, more developed embryos of *A. callidryas* assess risk and make hatching decisions based on shorter periods of cue sampling. Development also affects how well embryos execute their hatching decisions; some stages of hatching show a clear ontogenetic increase in performance, regardless of cue or context. However, context or cue type also affects both the process of risk assessment and hatching performance. Embryos spend less time in risk assessment during simulated attacks than they do under flooding. Moreover, some stages of hatching are consistently faster in simulated attacks than in flooding, suggesting that elements of hatching performance may reflect context-dependent variation in embryo effort more than developmental changes in embryo abilities. Thus, adaptive

context- and stage-dependent variation in embryo behavior appears to combine with information- and performance-related constraints to affect variation in risk-cued hatching.

## Challenges of studying behavior across development

In our hypoxia-cued hatching experiment, we needed to vary methods in order to test embryos across the maximum possible age range. Thus, the validity of our conclusions depends on whether different periods of development in cups or when we moved eggs (in cups) to test tanks altered embryo responses. This could occur if rearing in cups versus clutches, or in testing versus maintenance tanks, altered embryo development. However, based on external morphology, all tested embryos were developmentally similar to embryos reared in clutches. It could also occur if a 5 min wait between moving and flooding 3–5 day embryos was insufficient to exclude effects of moving them on subsequent behavior. We chose this wait time because mechanosensory-cued hatching usually occurs within 3 min of the cue (e.g. Warkentin et al., 2017; Jung et al., 2022). In our physical disturbance trials, the longest latency to hatch was consistent with this (4 days:  $1.2 \pm 1.0$  min, 0.29–3.17 min). An earlier stimulus could also alter responses to a subsequent cue in more subtle ways. For hatching responses to vibration, such effects are documented to persist for 45 s but disappear by 60 s in *A. callidryas* (Jung et al., 2022). Adult frogs similarly show a 45 s working memory for acoustic signals (Akre and Ryan, 2010). Both the behavioral consistency of embryos flooded at 5 days, after 5 min or 1–2 days in testing tanks, and the extensive oxygen-sampling evident after 5 min wait times suggest that the time at which embryos were moved to test tanks did not alter their response to hypoxia.

## Information sampling and decision making

Embryos of all ages showed a distinct cue-sampling period before beginning the hatching process; this was evident even at 6 days, when many embryos hatch spontaneously. Sampling duration decreased developmentally with both hypoxia and mechanosensory cues (Fig. 5), as predicted based on decreasing false-alarm costs. This extends findings from vibration playbacks at 5–6 days (Warkentin et al., 2019) to multiple threat contexts and a greater developmental range; consistently, more developed embryos base their hatching decisions on less information.

Cue type affected the sampling period even more than age; jiggled embryos initiated hatching 90% sooner after stimulus onset than flooded ones (Figs 2C and 5). This may reflect faster accumulation of both risk and information in predator attacks versus flooding. First, egg-eating snakes can consume clutches in just a few minutes and, in snake attacks, the longer embryos spend assessing cues, the more their risk of mortality increases (Warkentin and Caldwell, 2009; Warkentin et al., 2007). Rapid mortality in predator attacks may have selected for rapid risk assessment and decision making in response to mechanosensory cues. Conversely, even under strong hypoxia, submerged embryos survive and remain capable of hatching for over 20 min, enabling slower risk assessment (Fig. 2A). Under moderate hypoxia, they may continue developing *in ovo* for days, accepting slower development to achieve a more advanced stage at hatching (Moskowitz et al., 2016; Snyder et al., 2018). Second, the rate and process of information acquisition differ between contexts. Embryos can sample mechanosensory cues passively, without moving. Vibration frequency spectra are immediately apparent (Caldwell et al., 2009; Warkentin and Caldwell, 2009), while temporal pattern information accrues continuously over time



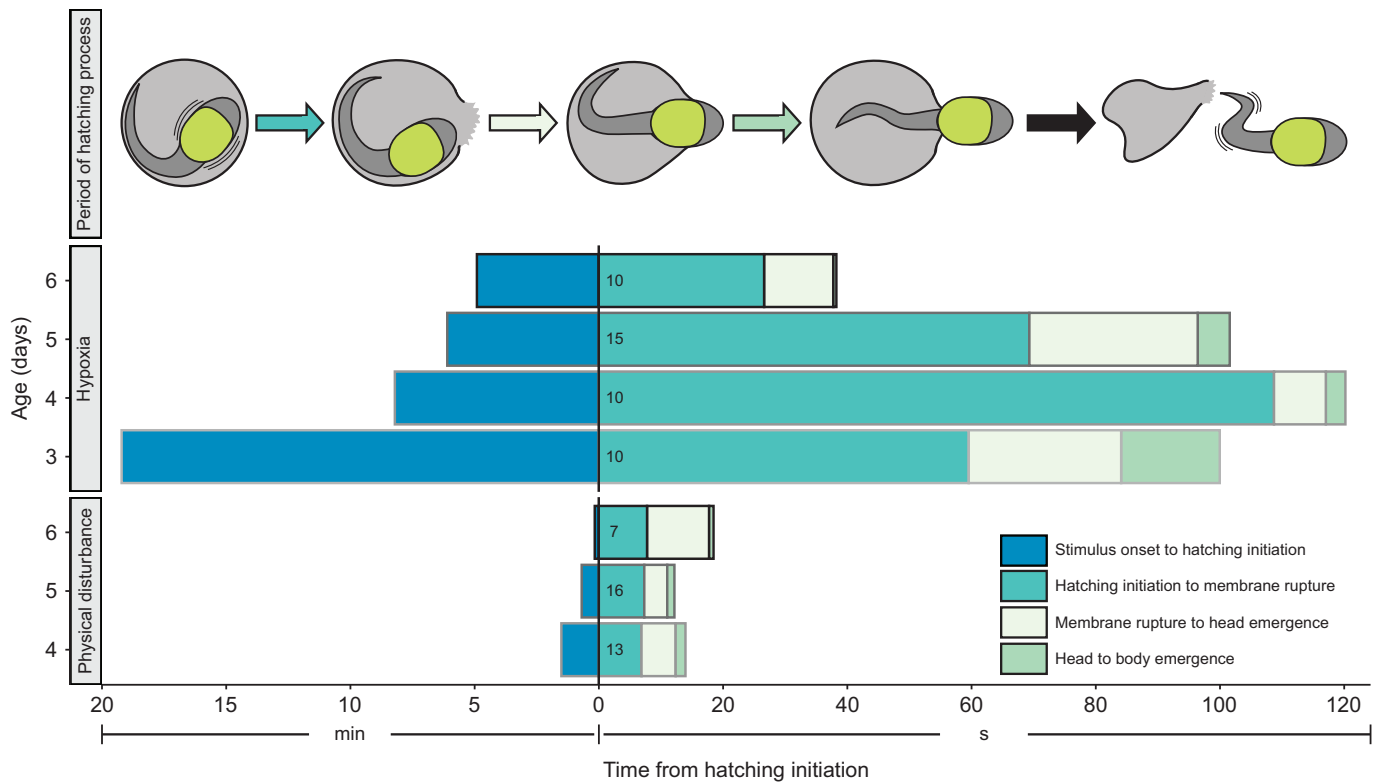

**Fig. 5. Mean duration of pre-hatching risk assessment and periods within the hatching process of *A. callidryas* embryos across ages and cue types.** Note the different x-axis scales for periods before and after hatching initiation. The total number of individuals tested per age, per cue type is shown within the bars; see Figs 2 and 3 for the number of individuals measured per age, per cue type for each period. Periods within the hatching process are color coded to match data presented in Fig. 3.

(Warkentin et al., 2007, 2019), even during periods of silence (Jung et al., 2022). However, oxygen assessment is more active and time consuming. Eggs in air contain hypoxic zones (Warkentin et al., 2005), so embryos must assess oxygen throughout their egg to determine that they are not simply facing away from the air-exposed surface. This requires changing position, which stirs the perivitelline fluid, disrupting oxygen gradients, which take time to reform (Rogge and Warkentin, 2008; Warkentin et al., 2005); thus, the local oxygen availability may be temporarily unclear. This slower process of information gathering under hypoxia likely prolongs the risk-assessment period.

Position changes are a clear behavioral indicator of cue sampling by flooded embryos (Movie 1; Rogge and Warkentin, 2008). Both movement rate and the number of position changes before embryos initiate hatching decreased with age in hypoxia experiments, suggesting that older embryos use less information for their hatching decision. The information embryos gain about oxygen per position might increase developmentally, for instance, if the reach of the external gills or their oxygen-sensing capacity increases (e.g. number or innervation of neuroepithelial cells; Pan and Burggren, 2010; Cochrane et al., 2021). Moreover, higher metabolic rates (17% higher at 6 versus 3 days; Moskowitz et al., 2016) could also contribute to reduced sampling at later stages. However, changes in metabolism and potential changes in sensing seem insufficient to fully explain the 86% decrease in positions sampled.

In mechanosensory-cue experiments, only 50% of embryos changed position before hatching and only 25% moved more than once. Embryos have no need to move to sense these cues; indeed, self-generated motion might complicate the interpretation of lateral line and vestibular system input, hampering assessment of predation

risk. Thus, embryos may avoid moving while assessing a physical disturbance. Rather than sampling, embryo position changes during egg jiggling may reflect tactile-stimulated startle responses within the egg (Eidietis, 2006), or attempts to evade predators, as embryos are often directly bitten and poked during attacks (Hughey et al., 2015; Warkentin et al., 2006). Thus, while we consider position changes to be a useful indicator of sampling effort by *A. callidryas* during flooding, embryo movements during real or simulated predator attacks likely have other causes and may serve different functions.

#### Latency to hatch as a proxy for sampling

The cue-sampling period of *A. callidryas* embryos represents a substantial, but variable, portion of latency to hatch (90–75% and 65–30% across ages, under flooding and jiggling, respectively; Fig. 2B), highlighting both the value and limitations of latency as an estimate of information sampling. Latency to hatch provides more information than proportion hatched alone (Warkentin et al., 2019) and can reveal variation in behavior even when a stimulus induces all embryos to hatch (Jung et al., 2020). However, sampling represents a smaller fraction of latency with mechanosensory cues than with hypoxia, particularly for older embryos. While latency is useful for comparisons within ages and cue types, and future studies of embryo risk assessment and hatching decisions should incorporate it along with hatching responses, more direct measurements of sampling will be essential in some contexts. The association between sampling period and latency to execute behaviors also varies contextually in other taxa and at later life stages. For example, variation in sampling period and behavioral performance both affect latency in mate choice by female túngara

frogs. In phonotaxis experiments, females choose mates faster in response to complex advertisement calls and under higher light conditions (Bonachea and Ryan, 2011a; Rand and Ryan, 1981). While complex calls shorten the initial evaluation period and females leave the starting zone faster, higher light conditions result in faster movements towards the speaker. Females also seem to spend less time evaluating calls as simulated predation risk increases (Bonachea and Ryan, 2011b).

### Hatching process and performance

The entire hatching process, from initiation to complete exit, was faster in response to mechanosensory cues than to hypoxia ( $14 \pm 7$  versus  $92 \pm 74$  s) and it was also less variable, particularly at 4–5 days (Figs 3A and 5). In previous work using a minimal mechanosensory stimulus, *A. callidryas* embryos at 5–6 days hatched in  $21 \pm 11$  s (range 6.5–49 s) (Cohen et al., 2016). In response to our stronger egg-jiggling stimulus, 6 day embryos performed similarly ( $18 \pm 10$  s, 9–34 s) whereas 4–5 day embryos hatched even faster ( $13 \pm 5$  s, 5.3–33 s; Fig. 3A). Faster – and more consistently fast – hatching in egg-jiggling versus flooding experiments is congruent with our hypothesis that embryos perceiving an immediate threat of predation perform hatching behaviors closer to the limits of their ability. This may be especially so for younger embryos, that spend more time assessing risk ( $50 \pm 62$  s at 4–5 days); the slightly slower, more variable hatching process of jiggled 6 day embryos follows very rapid risk assessment ( $8 \pm 7$  s). Contributing to overall faster hatching, most periods within the process were shorter and less variable in mechanosensory cue experiments (Fig. 3A–C,E). The longer, more variable duration of hatching in flooded eggs seems likely to reflect individual behavioral decisions or effort, rather than the embryos' full capability. This variation is consistent with substantial research on post-embryonic life stages, showing that animals' realized performance often differs from their maximum capacity, with performance close to capacity only in a subset of contexts (Irschick and Garland, 2001).

We anticipated that the transition from early to late HGC (age 3–4 days) and the increase in late HGC abundance over development (Cohen et al., 2019) would improve embryos' ability to rapidly rupture their vitelline membrane. Our data provide no evidence for such an ontogenetic change (Figs 3B and 5). For jiggled embryos, the shortest initiation to rupture time was at the youngest age (4 days,  $<1$  s). This period was longer in flooding, and more variable, with the two shortest times at 3 days (8.6, 12.4 s) below any 4 day time (all  $\geq 12.8$  s). Thus, it appears this metric rarely reflects embryos' full capacity, but comes closer under threat of predation. Most *A. callidryas* embryos use only a portion of their stored hatching enzyme per hatching attempt (Salazar-Nicholls et al., 2020), retaining enough to digest a second or even third escape hole if displaced (Salazar-Nicholls et al., 2017). Embryos might regulate enzyme release, using more to accelerate membrane rupture when seconds matter to escape predation or conserving it in case repeated hatching attempts are necessary. They might also behaviorally facilitate rupture by pressing their head against the membrane to increase HGC–membrane contact. Flooded embryos lose the oxygen gradient that helps them orient – and hatch – toward the exposed side of their egg, and in glass cups they also lose directional light cues; this increases the frequency of hatching complications and the need for a second rupture site (Güell and Warkentin, 2018; Salazar-Nicholls et al., 2017). Moreover, in both snake and wasp attacks, embryos sometimes move – or are pushed – away from their initial rupture site (K.M.W., observations from

video recordings). Thus, the ability to make a second rupture might be an important element of hatching performance and/or developmental constraint (Salazar-Nicholls et al., 2017).

Like initiation to rupture, the period from rupture to head emergence showed no age effect but was longer and more variable in flooded versus jiggled embryos (Fig. 3C). This likely reflects behavioral decisions or effort, with flooded embryos using less of their capacity. Most embryos press their snout against the perivitelline membrane during or soon after enzyme release and use thrashing movements to accelerate their exit (Cohen et al., 2016); indeed, the timing of thrashing onset explains much of the variation in head emergence (Fig. 3E). In contrast, the period from thrashing onset to exit showed different ontogenetic patterns across cue types. In flooding, this period decreased developmentally, whereas jiggled embryos showed intermediate values with no developmental change (Fig. 3F). This may reflect a combination of effort and constraint. The earlier onset of thrashing in jiggling experiments suggests that embryos perceiving predation risk attempt to behaviorally hasten their exit; however, later thrashing of flooded embryos could allow time for greater membrane digestion. Consistent with this, in flooding, most 6 day and several 5 day embryos exited with a single tail flick, in  $<0.03$  s, whereas jiggled embryos were never that fast. Moreover, the long thrashing to exit periods of the youngest hatching-competent embryos, even after a post-rupture wait, suggest a stronger developmental constraint.

Both the period from head to body emergence and incidence of body compression during this period decreased strongly with age, with no cue effect, indicating developmental constraints (Figs 3D, 4 and 5). Several morphological changes seem likely to improve these elements of hatching performance. Over the plastic hatching period, embryos grow longer, more muscular tails and become more streamlined as yolk is transformed into other tissues (Warkentin, 1999b). At 3 days, embryos have small heads and their yolk-filled bellies are the widest part of their body (Fig. 1B; Movies 1 and 3); even with active thrashing, their exit typically slows once their head has emerged and body compression is always evident as their bulbous yolk squeezes through the rupture site (Fig. 4). In contrast, by 6 days embryos' heads are wider than their bodies, facilitating a quick, smooth exit once the head has emerged (Movie 2). This acceleration of emergence and lower incidence of compression also suggest that older embryos make larger holes in the membrane; they might release more hatching enzyme and their broader heads could enable enzyme delivery to a larger area of membrane (Salazar-Nicholls et al., 2020). Moreover, greater reach, propulsive area and strength may increase thrashing effectiveness and exit speed as embryos develop.

### Understanding variation in latency to hatch

The fact that *A. callidryas* use multiple cue types to hatch in multiple risk contexts enables consistent developmental changes in the process to be distinguished from context-specific differences in behavior or performance. The former may reflect either ontogenetic adaptations or release from developmental constraints, while the latter may reflect adaptive variation or differences in environmental constraints. More generally, distinguishing the component processes that comprise cued hatching, and when each occurs, can facilitate identification of factors and mechanisms that generate variation at each stage of the process (Fig. 6). This framework for assessing determinants of variation in hatching should be applicable within and among species.

Published measures of cued hatching timing rarely distinguish assessment from hatching periods, and hatching may also be

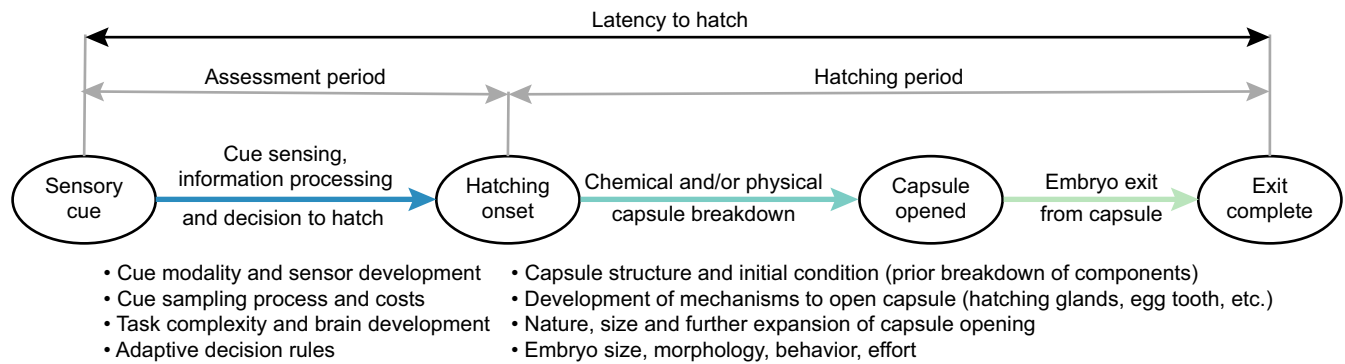

**Fig. 6. Elements of variation in latency to hatch.** The total time from sensory cue to complete exit includes both assessment and hatching periods (gray arrows), which may be further subdivided, as illustrated for hatching. The processes within each period (colored arrows) depend on multiple factors that vary with evolution, development and environmental context (examples listed).

initiated by internal, developmental events rather than external cues. However, all embryos must hatch from their protective capsules and both the overall duration of the process and the dominance of stages within it vary. When hatchlings of low mobility remain near their egg clutch, fitness trade-offs at hatching and selection for hatching speed may be limited. Moreover, the capsule structure and mechanism for opening it may impose constraints. Some aquatic amphibian eggs hatch more slowly than *A. callidryas*, with emergence from jelly coats, enzymatic degradation of the vitelline membrane, then localized weakening, rupture and emergence taking half the embryonic period (e.g. Carroll and Hedrick, 1974; reviewed in Cohen et al., 2016; Yoshizaki, 1978). Many reptiles and birds are also slow to hatch, taking hours to days to completely emerge from the egg after pipping (Doody, 2011; Oppenheim, 1972, 1973; Visschedijk, 1968). At the other extreme, when rapid emergence is essential for hatchlings to exploit a transient opportunity or escape a sudden threat, hatching latency may be brief. The California grunion, a terrestrially incubated fish that hatches in response to agitation by waves, emerges <1.5 min after stimulus onset (Speer-Blank and Martin, 2004), while delicate skinks hatch in <10 s in response to a simulated predator attack (Doody and Paull, 2013). Moreover, some parasitic flatworms (*Monogenea*) hatch just 2–4 s after exposure to skin mucus from their host fish, physical disturbance or sudden shadows (reviewed in Whittington and Kearn, 2011). Although we do not know their separate durations, such fast responses must involve both a rapid assessment and decision process and speedy mechanisms to rupture and exit the capsule.

The duration of the hatching period depends on egg capsule structure and the mechanisms used to open and exit from it (Fig. 6). Many species, including flatworms (Kearn et al., 1999), nematodes (Mkandawire et al., 2022), insects (Donoughe, 2021) and gastropods (Rawlings, 1999), have opercula or polar plugs that facilitate rupture and provide predefined exit sites. Conversely, bird embryos must create an exit site by cracking their eggshell bit by bit around an arc (Hamburger and Oppenheim, 1967; Oppenheim, 1972, 1973). In many aquatic-breeding anurans, the entire vitelline membrane is digested by gradual hatching enzyme release, while *A. callidryas* use rapid, localized enzyme release to digest a small escape hole (Cohen et al., 2018; Yamasaki et al., 1990; Yoshizaki, 1978; Yoshizaki and Katagiri, 1975). Anticipatory changes to the capsule can also speed hatching. For instance, while embryos of some flatworms enzymatically soften their opercular cement on perceiving a cue, hatching in 4–5 min, others pre-weaken the cement and can exit in as little as 2 s (Whittington and Kearn, 2011).

Hatching may also be linked to, and slowed by, associated developmental processes. For instance, in reptiles, complete emergence after pipping can be delayed for days as the hatchlings wait for their yolk to be internalized (Pezaro et al., 2013). Alternatively, to emerge rapidly, reptiles may sacrifice energy reserves, leaving yolk behind when they exit (Doody and Paull, 2013).

Cued hatching requires mechanisms linking environmental context to hatching timing; thus, cue sensing is often the first step. In the simplest case, if embryos hatch in a single context, using a consistent, distinctive cue, sensing the cue could trigger a reflexive response. This might occur, for instance, in the rapid responses of some flatworms to host mucus or sudden darkness (Whittington and Kearn, 2011). A simple circuit from transient hindbrain photoreceptors to hatching gland cells mediates light-inhibited/dark-induced hatching in Atlantic halibut (Eilertsen et al., 2018). In other cases – such as *A. callidryas* – if embryos use multiple cue types, information accrues more slowly and hatching cues are less distinct from the background, information processing will be more complex and the assessment period longer (Jung et al., 2022; Warkentin and Caldwell, 2009). In such cases, as with decisions at later life stages, assessment costs may also affect the decision process and timing (Warkentin et al., 2007). Moreover, developmental changes in the costs of missed cues or false alarms may select for ontogenetic adaptations in assessment and decision strategies (Jung et al., 2021; Warkentin et al., 2019).

Hatching is an essential, irreversible behavior that causes greater physiological and ecological change than most animal actions. Across taxa, embryos gather information from outside their egg to make informed hatching decisions that improve their immediate and ultimate survival (Du and Shine, 2022; Warkentin, 2011). The rapidly developing cognitive and physical capabilities of embryos make hatching an excellent, and underutilized, process in which to study how development affects information use and behavioral performance across contexts.

#### Acknowledgements

We thank Alina Chaiyasarikul, Karina Escobar, Su Jin Kim, Nora Moscovitz, Sonia Pérez Arias, María José Salazar Nicholls, Crystal Tippet and Angelly Vasquez for assistance with egg collection and care, and Richard Wassersug for discussions of embryo cranial kinematics. We thank members of the Gamboa Frog Group at STRI and Egg Science Research Group at Boston University for discussions of this work at multiple stages, and Ben Johnson and two anonymous reviewers for comments on the manuscript.

#### Competing interests

The authors declare no competing or financial interests.



## Author contributions

Conceptualization: K.M.W.; Methodology: B.A.G., J.J., A.A., J.C., K.M.W.; Formal analysis: B.A.G.; Investigation: B.A.G., J.J., A.A., J.C., K.M.W.; Resources: K.M.W.; Data curation: B.A.G.; Writing - original draft: B.A.G.; Writing - review & editing: B.A.G., J.J., A.A., J.C., K.M.W.; Visualization: B.A.G., K.M.W.; Supervision: K.M.W.; Project administration: K.M.W.; Funding acquisition: K.M.W.

## Funding

Funding was provided by the National Science Foundation (IOS-1354072 to K.M.W., STRI-REU DBI-1359299 to B.A.G.), Boston University, and the Smithsonian Tropical Research Institute.

## Data availability

Data are available from the Dryad Digital Repository (Güell et al., 2022): <https://doi.org/10.5061/dryad.g4f4qrfsp>

## References

- Akre, K. L. and Ryan, M. J. (2010). Complexity increases working memory for mating signals. *Curr. Biol.* **20**, 502-505. doi:10.1016/j.cub.2010.01.021
- Altig, R. and McDiarmid, R. W. (2007). Morphological diversity and evolution of egg and clutch structure in amphibians. *Herpetol. Monogr.* **21**, 1-32. doi:10.1655/06-005.1
- Bate, M. (1999). Development of motor behaviour. *Curr. Opin. Neurobiol.* **9**, 670-675. doi:10.1016/S0959-4388(99)00031-8
- Bates, D., Mäechler, M., Bolker, B. and Walker, S. (2015). Fitting linear mixed-effects models using {lme4}. *J. Stat. Softw.* **67**, 1-48. doi:10.18637/jss.v067.i01
- Bles, E. J. (1906). XXXI.—The life-history of *Xenopus laevis*, Daud. *Trans. R. Soc. Edinb.* **41**, 789-821. doi:10.1017/S0080456800035584
- Bonachea, L. A. and Ryan, M. J. (2011a). Localization error and search costs during mate choice in túngara frogs, *Physalaemus pustulosus*. *Ethology* **117**, 56-62. doi:10.1111/j.1439-0310.2010.01843.x
- Bonachea, L. A. and Ryan, M. J. (2011b). Simulated predation risk influences female choice in túngara frogs, *Physalaemus pustulosus*. *Ethology* **117**, 400-407. doi:10.1111/j.1439-0310.2011.01889.x
- Bradbury, J. W. and Vehrencamp, S. L. (1998). *Principles of Animal Communication*. Sunderland: Sinauer.
- Caldwell, M. S., Mcdaniel, J. G. and Warkentin, K. M. (2009). Frequency information in the vibration-cued escape hatching of red-eyed treefrogs. *J. Exp. Biol.* **212**, 566-575. doi:10.1242/jeb.026518
- Carroll, E. J., Jr. and Hedrick, J. L. (1974). Hatching in the toad *Xenopus laevis*: morphological events and evidence for a hatching enzyme. *Dev. Biol.* **38**, 1-13. doi:10.1016/0012-1606(74)90254-1
- Cochrane, P. V., Jonz, M. G. and Wright, P. A. (2021). The development of the O<sub>2</sub>-sensing system in an amphibious fish: consequences of variation in environmental O<sub>2</sub> levels. *J. Comp. Phys. B* **191**, 681-699. doi:10.1007/s00360-021-01379-5
- Cohen, K. L., Seid, M. A. and Warkentin, K. M. (2016). How embryos escape from danger: the mechanism of rapid, plastic hatching in red-eyed treefrogs. *J. Exp. Biol.* **219**, 1875-1883. doi:10.1242/jeb.139519
- Cohen, K. L., Piacentino, M. L. and Warkentin, K. M. (2018). The hatching process and mechanisms of adaptive hatching acceleration in hourglass treefrogs, *Dendropsophus ebraccatus*. *Comp. Biochem. Phys. A* **217**, 63-74. doi:10.1016/j.cbpa.2017.10.020
- Cohen, K. L., Piacentino, M. L. and Warkentin, K. M. (2019). Two types of hatching gland cells facilitate escape-hatching at different developmental stages in red-eyed treefrogs, *Agalychnis callidryas* (Anura: Phyllomedusidae). *Biol. J. Linn. Soc.* **126**, 751-767. doi:10.1093/biolinnean/bly214
- Dall, S. R., Giraldeau, L.-A., Olsson, O., Mcnamara, J. M. and Stephens, D. W. (2005). Information and its use by animals in evolutionary ecology. *Trends Ecol. Evol.* **20**, 187-193. doi:10.1016/j.tree.2005.01.010
- Danchin, E., Giraldeau, L.-A., Valone, T. J. and Wagner, R. H. (2004). Public information: from nosy neighbors to cultural evolution. *Science* **305**, 487-491. doi:10.1126/science.1098254
- Donoghue, S. (2021). Insect egg morphology: evolution, development, and ecology. *Curr. Opin. Insect Sci.* **50**, 100868. doi:10.1016/j.cois.2021.12.008
- Doody, J. S. (2011). Environmentally cued hatching in reptiles. *Integr. Comp. Biol.* **51**, 49-61. doi:10.1093/icb/ict043
- Doody, J. S. and Paull, P. (2013). Hitting the ground running: environmentally cued hatching in a lizard. *Copeia* **2013**, 160-165. doi:10.1643/CE-12-111
- Du, W.-G. and Shine, R. (2022). The behavioural and physiological ecology of embryos: responding to the challenges of life inside an egg. *Biol. Rev.* **97**, 1272-1286. doi:10.1111/brv.12841
- Dumont, J. N. and Brummett, A. R. (1985). Egg envelopes in vertebrates. In *Oogenesis. Developmental Biology (A Comprehensive Synthesis)*, Vol. 1 (ed. L. W. Browder), pp. 235-288. Boston, MA: Springer.
- Eidietis, L. (2006). The tactile-stimulated startle response of tadpoles: acceleration performance and its relationship to the anatomy of wood frog (*Rana sylvatica*), bullfrog (*Rana catesbeiana*), and American toad (*Bufo americanus*) tadpoles. *J. Exp. Zool. A* **305**, 348-362. doi:10.1002/jez.a.269
- Eilertsen, M., Valen, R., Drivenes, Ø., Ebbesson, L. O. and Helvik, J. V. (2018). Transient photoreception in the hindbrain is permissive to the life history transition of hatching in Atlantic halibut. *Dev. Biol.* **444**, 129-138. doi:10.1016/j.ydbio.2018.10.006
- Gervais, C. R., Nay, T. and Brown, C. (2021). Friend or foe? Development of odour detection, differentiation and antipredator response in an embryonic elasmobranch. *Mar. Freshwater Res.* **72**, 942-949. doi:10.1071/MF20108
- Gibbons, M. E. and George, M. P. (2013). Clutch identity and predator-induced hatching affect behavior and development in a leaf-breeding treefrog. *Oecologia* **171**, 831-843. doi:10.1007/s00442-012-2443-4
- Güell, B. A. and Warkentin, K. M. (2018). When and where to hatch? Red-eyed treefrog embryos use light cues in two contexts. *PeerJ* **6**, e6018. doi:10.7717/peerj.6018
- Güell, B. A. et al. (2022). Ontogeny of risk assessment and escape-hatching performance by red-eyed treefrog embryos in two threat contexts. Dryad, Dataset. doi:10.5061/dryad.g4f4qrfsp
- Hamburger, V. and Oppenheim, R. (1967). Prehatching motility and hatching behavior in the chick. *J. Exp. Zool.* **166**, 171-203. doi:10.1002/jez.1401660203
- Hothorn, T., Bretz, F. and Westfall, P. (2008). Simultaneous inference in general parametric models. *Biometrical J.* **50**, 346-363. doi:10.1002/bimj.200810425
- Hughey, M. C., Rogge, J. R., Thomas, K., McCoy, M. W. and Warkentin, K. M. (2015). Escape-hatching responses of individual treefrog embryos vary with threat level in wasp attacks: a mechanistic analysis. *Behaviour* **152**, 1543-1568. doi:10.1163/1568539X-00003291
- Irschick, D. J. and Garland, T., Jr. (2001). Integrating function and ecology in studies of adaptation: investigations of locomotor capacity as a model system. *Annu. Rev. Ecol. Syst.* **32**, 367-396. doi:10.1146/annurev.ecolsys.32.081501.114048
- Jung, J., Mcdaniel, J. G. and Warkentin, K. M. (2017). Ontogeny of vibration-cued escape hatching in red-eyed treefrogs: two reasons older embryos hatch more. *Integr. Comp. Biol.* **57**, e82. doi:10.1093/icb/ixc001
- Jung, J., Güell, B. A. and Warkentin, K. W. (2018). Inner ear development across onset and improvement of escape-hatching ability in red-eyed treefrogs: a confocal and µCT analysis. *Integr. Comp. Biol.* **58**, e348. doi:10.1093/icb/icy002
- Jung, J., Kim, S. J., Pérez Arias, S. M., Mcdaniel, J. G. and Warkentin, K. M. (2019). How do red-eyed treefrog embryos sense motion in predator attacks? Assessing the role of vestibular mechanoreception. *J. Exp. Biol.* **222**, jeb206052. doi:10.1242/jeb.206052
- Jung, J., Serrano-Rojas, S. J. and Warkentin, K. M. (2020). Multimodal mechanosensing enables treefrog embryos to escape egg-predators. *J. Exp. Biol.* **223**, jeb236141. doi:10.1242/jeb.236141
- Jung, J., Mcdaniel, J. G. and Warkentin, K. M. (2021). Escape-hatching decisions show adaptive ontogenetic changes in how embryos manage ambiguity in predation risk cues. *Behav. Ecol. Sociobiol.* **75**, 141. doi:10.1007/s00265-021-03070-9
- Jung, J., Guo, M., Crovella, M., Mcdaniel, J. G. and Warkentin, K. M. (2022). Frog embryos use multiple levels of temporal pattern in risk assessment for vibration-cued hatching. *Anim. Cogn.* doi:10.1007/s10071-022-01634-4
- Kearn, G., Evans-Gowing, R. and Tappenden, T. (1999). The opercular bond in the egg-shell of the monogenean *Entobdella soleae*, a plathyhelminth skin parasite of the common sole (*Solea solea*). *Parasitology* **118**, 433-438. doi:10.1017/S0031182099003996
- Mkandawire, T. T., Grencis, R. K., Berriman, M. and Duque-Correa, M. A. (2022). Hatching of parasitic nematode eggs: a crucial step determining infection. *Trends Parasitol.* **38**, 174-187. doi:10.1016/j.pt.2021.08.008
- Moskowitz, N. A., Vasquez, A. M. and Warkentin, K. M. (2016). Embryo decisions and developmental changes in metabolism across the plastic hatching period of red-eyed treefrogs. *Integr. Comp. Biol.* **56**, e337. doi:10.1093/icb/icw001
- Oppenheim, R. W. (1972). Prehatching and hatching behaviour in birds: a comparative study of altricial and precocial species. *Anim. Behav.* **20**, 644-655. doi:10.1016/S0003-3472(72)80137-4
- Oppenheim, R. W. (1973). Prehatching and hatching behavior: A comparative and physiological consideration. In *Behavioral Embryology: Studies on the Development of Behavior and the Nervous System* (ed. G. Gottlieb), pp. 163-244. New York: Academic Press.
- Pan, T. C. and Burggren, W. W. (2010). Onset and early development of hypoxic ventilatory responses and branchial neuroepithelial cells in *Xenopus laevis*. *Comp. Biochem. Phys. A* **157**, 382-391. doi:10.1016/j.cbpa.2010.08.018
- Pezaro, N., Doody, J. S., Green, B. and Thompson, M. B. (2013). Hatching and residual yolk internalization in lizards: evolution, function and fate of the amnion. *Evol. Dev.* **15**, 87-95. doi:10.1111/ede.12019
- Rand, A. S. and Ryan, M. J. (1981). The adaptive significance of a complex vocal repertoire in a neotropical frog. *Z. Tierpsychol.* **57**, 209-214. doi:10.1111/j.1439-0310.1981.tb01923.x
- Rawlings, T. A. (1999). Adaptations to physical stresses in the intertidal zone: the egg capsules of neogastropod molluscs. *Am. Zool.* **39**, 230-243. doi:10.1093/icb/39.2.230

- Rogge, J. R. and Warkentin, K. M. (2008). External gills and adaptive embryo behavior facilitate synchronous development and hatching plasticity under respiratory constraint. *J. Exp. Biol.* **211**, 3627–3635. doi:10.1242/jeb.020958
- Romagny, S., Darmaillacq, A.-S., Guibé, M., Bellanger, C. and Dickel, L. (2012). Feel, smell and see in an egg: emergence of perception and learning in an immature invertebrate, the cuttlefish embryo. *J. Exp. Biol.* **215**, 4125–4130. doi:10.1242/jeb.078295
- Salazar-Nicholls, M. J., Escobar, K. D. and Warkentin, K. M. (2017). Development of hatching ability in red-eyed treefrogs: escape from complications. *Integr. Comp. Biol.* **57**, e146. doi:10.1093/icb/ixc001
- Salazar-Nicholls, M., Macias, H. and Warkentin, K. (2020). Ontogeny and extent of hatching enzyme accumulation in red-eyed treefrog embryos. *Integr. Comp. Biol.* **60**, e410. doi:10.1093/icb/icaa007
- Salica, M. J., Vonesh, J. R. and Warkentin, K. M. (2017). Egg clutch dehydration induces early hatching in red-eyed treefrogs, *Agalychnis callidryas*. *PeerJ* **5**, e3549. doi:10.7717/peerj.3549
- Schneider, C. A., Rasband, W. S. and Eliceiri, K. W. (2012). NIH Image to ImageJ: 25 years of image analysis. *Nat. Methods* **9**, 671–675. doi:10.1038/nmeth.2089
- Snyder, R. K., Ospina-L, A. M. and Warkentin, K. M. (2018). When does flooding induce hatching? Behavioral decisions of red-eyed treefrog embryos under moderate hypoxia. *Integr. Comp. Biol.* **58**, e422. doi:10.1093/icb/icy002
- Speer-Blank, T. M. and Martin, K. L. (2004). Hatching events in the California grunion, *Leuresthes tenuis*. *Copeia* **2004**, 21–27. doi:10.1643/CI-03-156R1
- Touchon, J. C., McCoy, M. W., Vonesh, J. R. and Warkentin, K. M. (2013). Effects of plastic hatching timing carry over through metamorphosis in red-eyed treefrogs. *Ecology* **94**, 850–860. doi:10.1890/12-0194.1
- Vasquez, A. M., Moskowitz, N. A. and Warkentin, K. M. (2016). Embryo decisions, metabolism, and development when arboreal eggs are flooded. *Integr. Comp. Biol.* **56**, e385. doi:10.1093/icb/icw001
- Visschedijk, A. H. J. (1968). The air space and embryonic respiration 2. The times of pipping and hatching as influenced by an artificially changed permeability of the shell over the air space. *Brit. Poultry Sci.* **9**, 185–196. doi:10.1080/00071666808415708
- Warkentin, K. M. (1995). Adaptive plasticity in hatching age: a response to predation risk trade-offs. *Proc. Natl. Acad. Sci. USA* **92**, 3507–3510. doi:10.1073/pnas.92.8.3507
- Warkentin, K. M. (1999a). The development of behavioral defenses: a mechanistic analysis of vulnerability in red-eyed tree frog hatchlings. *Behav. Ecol.* **10**, 251–262. doi:10.1093/beheco/10.3.251
- Warkentin, K. M. (1999b). Effects of hatching age on development and hatchling morphology in the red-eyed treefrog, *Agalychnis callidryas*. *Biol. J. Linn. Soc.* **68**, 443–470.
- Warkentin, K. M. (2002). Hatching timing, oxygen availability, and external gill regression in the tree frog, *Agalychnis callidryas*. *Physiol. Biochem. Zool.* **75**, 155–164. doi:10.1086/339214
- Warkentin, K. M. (2005). How do embryos assess risk? Vibrational cues in predator-induced hatching of red-eyed treefrogs. *Anim. Behav.* **70**, 59–71. doi:10.1016/j.anbehav.2004.09.019
- Warkentin, K. M. (2011). Environmentally cued hatching across taxa: embryos respond to risk and opportunity. *Integr. Comp. Biol.* **51**, 14–25. doi:10.1093/icb/ict017
- Warkentin, K. M. and Caldwell, M. S. (2009). Assessing risk: embryos, information, and escape hatching. In *Cognitive Ecology II* (ed. R. Dukas and J. M. Ratcliffe), pp. 177–200. Chicago: University of Chicago Press.
- Warkentin, K. M., Gomez-Mestre, I. and Mcdaniel, J. G. (2005). Development, surface exposure, and embryo behavior affect oxygen levels in eggs of the red-eyed treefrog, *Agalychnis callidryas*. *Physiol. Biochem. Zool.* **78**, 956–966. doi:10.1086/432849
- Warkentin, K. M., Buckley, C. R. and Metcalf, K. A. (2006). Development of red-eyed treefrog eggs affects efficiency and choices of egg-foraging wasps. *Anim. Behav.* **71**, 417–425. doi:10.1016/j.anbehav.2005.06.007
- Warkentin, K. M., Caldwell, M. S., Siok, T. D., D'amato, A. T. and Mcdaniel, J. G. (2007). Flexible information sampling in vibrational assessment of predation risk by red-eyed treefrog embryos. *J. Exp. Biol.* **210**, 614–619. doi:10.1242/jeb.001362
- Warkentin, K. M., Cuccaro Diaz, J., Güell, B. A., Jung, J., Kim, S. J. and Cohen, K. L. (2017). Developmental onset of escape-hatching responses in red-eyed treefrogs depends on cue type. *Anim. Behav.* **129**, 103–112. doi:10.1016/j.anbehav.2017.05.008
- Warkentin, K. M., Jung, J., Rueda Solano, L. A. and Mcdaniel, J. G. (2019). Ontogeny of escape-hatching decisions: vibrational cue use changes as predicted from costs of sampling and false alarms. *Behav. Ecol. Sociobiol.* **73**, 51. doi:10.1007/s00265-019-2663-2
- Whittington, I. D. and Kearn, G. C. (2011). Hatching strategies in monogenean (platyhelminth) parasites that facilitate host infection. *Integr. Comp. Biol.* **51**, 91–99. doi:10.1093/icb/ict003
- Wiedenmayer, C. P. (2009). Plasticity of defensive behavior and fear in early development. *Neurosci. Biobehav. Rev.* **33**, 432–441. doi:10.1016/j.neubiorev.2008.11.004
- Willink, B., Palmer, M. S., Landberg, T., Vonesh, J. R. and Warkentin, K. M. (2014). Environmental context shapes immediate and cumulative costs of risk-induced early hatching. *Evol. Ecol.* **28**, 103–116. doi:10.1007/s10682-013-9661-z
- Yamagami, K. (1981). Mechanisms of hatching in fish: secretion of hatching enzyme and enzymatic choriolysis. *Am. Zool.* **21**, 459–471. doi:10.1093/icb/21.2.459
- Yamagami, K. (1988). Mechanisms of hatching in fish. In *Fish Physiology Vol. 11, Part A. The Physiology of Developing Fish: Eggs and Larvae* (ed. W. S. Hoar and D. J. Randall), pp. 447–499. Academic Press.
- Yamasaki, H., Katagiri, C. and Yoshizaki, N. (1990). Selective degradation of specific components of fertilization coat and differentiation of hatching gland cell during the two phase hatching of *Bufo japonicus* embryos. *Dev. Growth Differ.* **32**, 65–72. doi:10.1111/j.1440-169X.1990.00065.x
- Yoshizaki, N. (1978). Disintegration of the vitelline coat during the hatching process in the frog. *J. Exp. Zool.* **203**, 127–133. doi:10.1002/jez.1402030112
- Yoshizaki, N. and Katagiri, C. (1975). Cellular basis for the production and secretion of the hatching enzyme by frog embryos. *J. Exp. Zool.* **192**, 203–212. doi:10.1002/jez.1401920210
